# Supplementary material
Source: PubMed Central journal article supplement (PMC3093876)
Supplement: supp_M110.208108_jbc.M110.208108-1.pdf [file supp_M110.208108_jbc.M110.208108-1.pdf]

Supplemental Material

**A MULTI-DOMAIN FRAGMENT OF NOGO-A IS A POTENT INHIBITOR OF  
CORTICAL AXON REGENERATION VIA NOGO RECEPTOR 1**

**Eric A. Huebner<sup>1</sup>, Byung G. Kim<sup>1,2</sup>, Philip J. Duffy<sup>1</sup>, Rebecca H. Brown<sup>1</sup> and  
Stephen M. Strittmatter<sup>1,3</sup>**

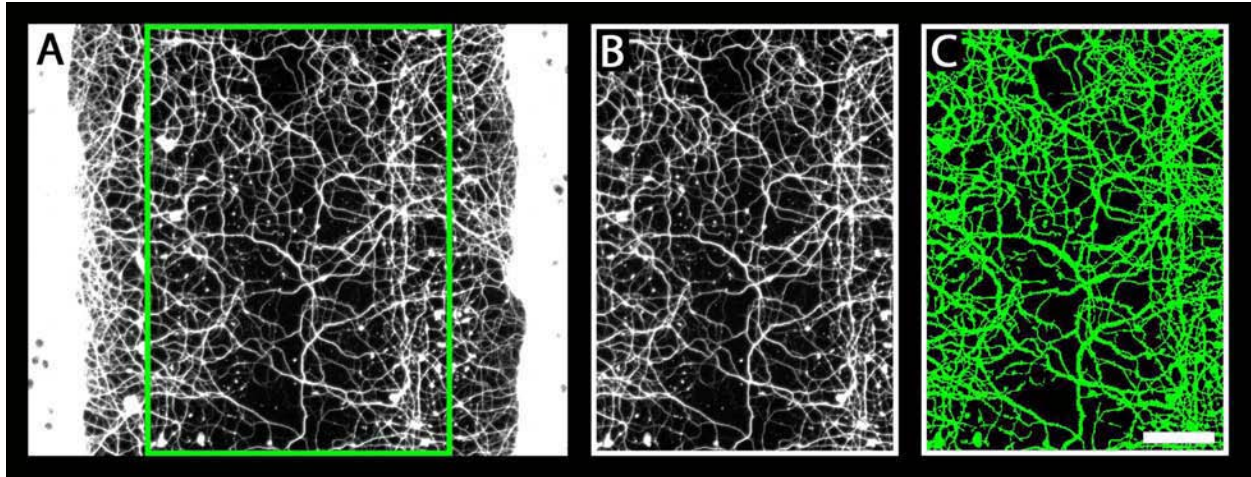

**Supplemental Fig. S1. Quantification of axon regeneration in the cortical scrape assay.** An automated image analysis protocol was created, using MetaXpress version 1.7 software, to measure axonal area in the lesion center. *A*, Photomicrograph of a cortical culture which was scraped at 21 DIV and regenerated for 5 days.  $\beta$ III-tubulin immunostaining allows visualization of regenerated neurites. *B*, The image is cropped to the boxed region in *A*, which encompasses the central ~75 percent of the lesion. *C*, Axonal area is measured and recorded. A computer-generated mask (green) indicates the axonal area quantified. Scale bar, 100  $\mu$ m.
